# Supplementary material for: Nicotinamide produced by Bifidobacterium longum A127 ameliorates heat stress-induced brain damage by inhibiting the p38 MAPK pathway
Source: Research Square preprint supplement (doi:10.21203/rs.3.rs-7331250/v1), 2025-11-19
Supplement: Supplementary file 1 [file a19100b9963b01f00ad7df64.docx]

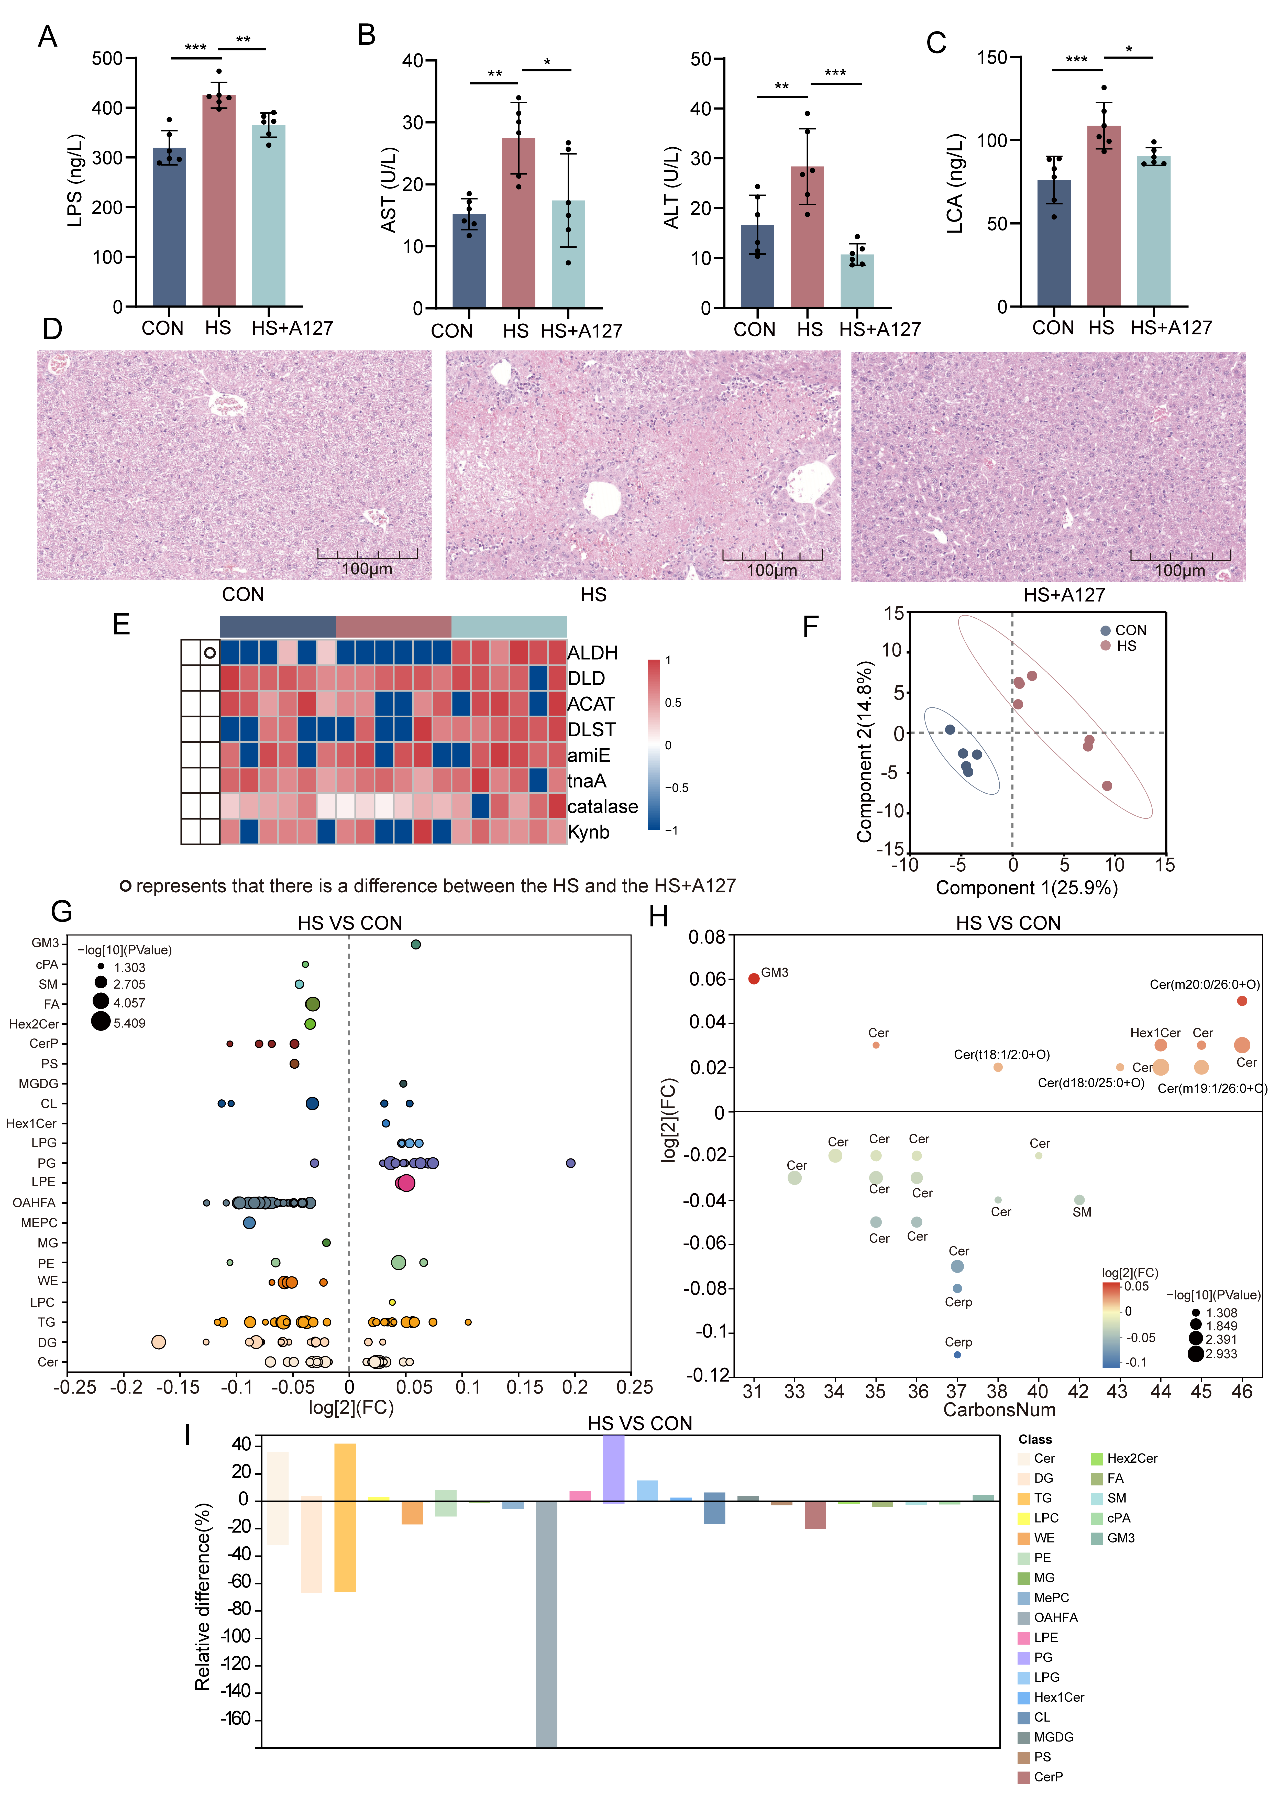


**Figure S1. A** LPS levels in serum. **B** AST and ALT levels in serum. **C** LCA (lithocholic acid) levels in serum. **D** HE staining analysis of liver sections; scale bar = 100 μm. **E** Heatmap showing the abundance of tryptophan metabolism pathways in the metagenome. **F** OPLS-DA score plot of metabolic profiles related to lipidomics between the CON and HS groups. **G** Bubble plot of differential lipids. **H** Bubble plot of differentially abundant carbon chain lengths. **I** Bar plot of differential lipids. The data are presented as the means ± standard deviations. P values were determined by one-way ANOVA followed by Dunnett's multiple comparison test. *p < 0.05, **p < 0.01, ***p < 0.001.


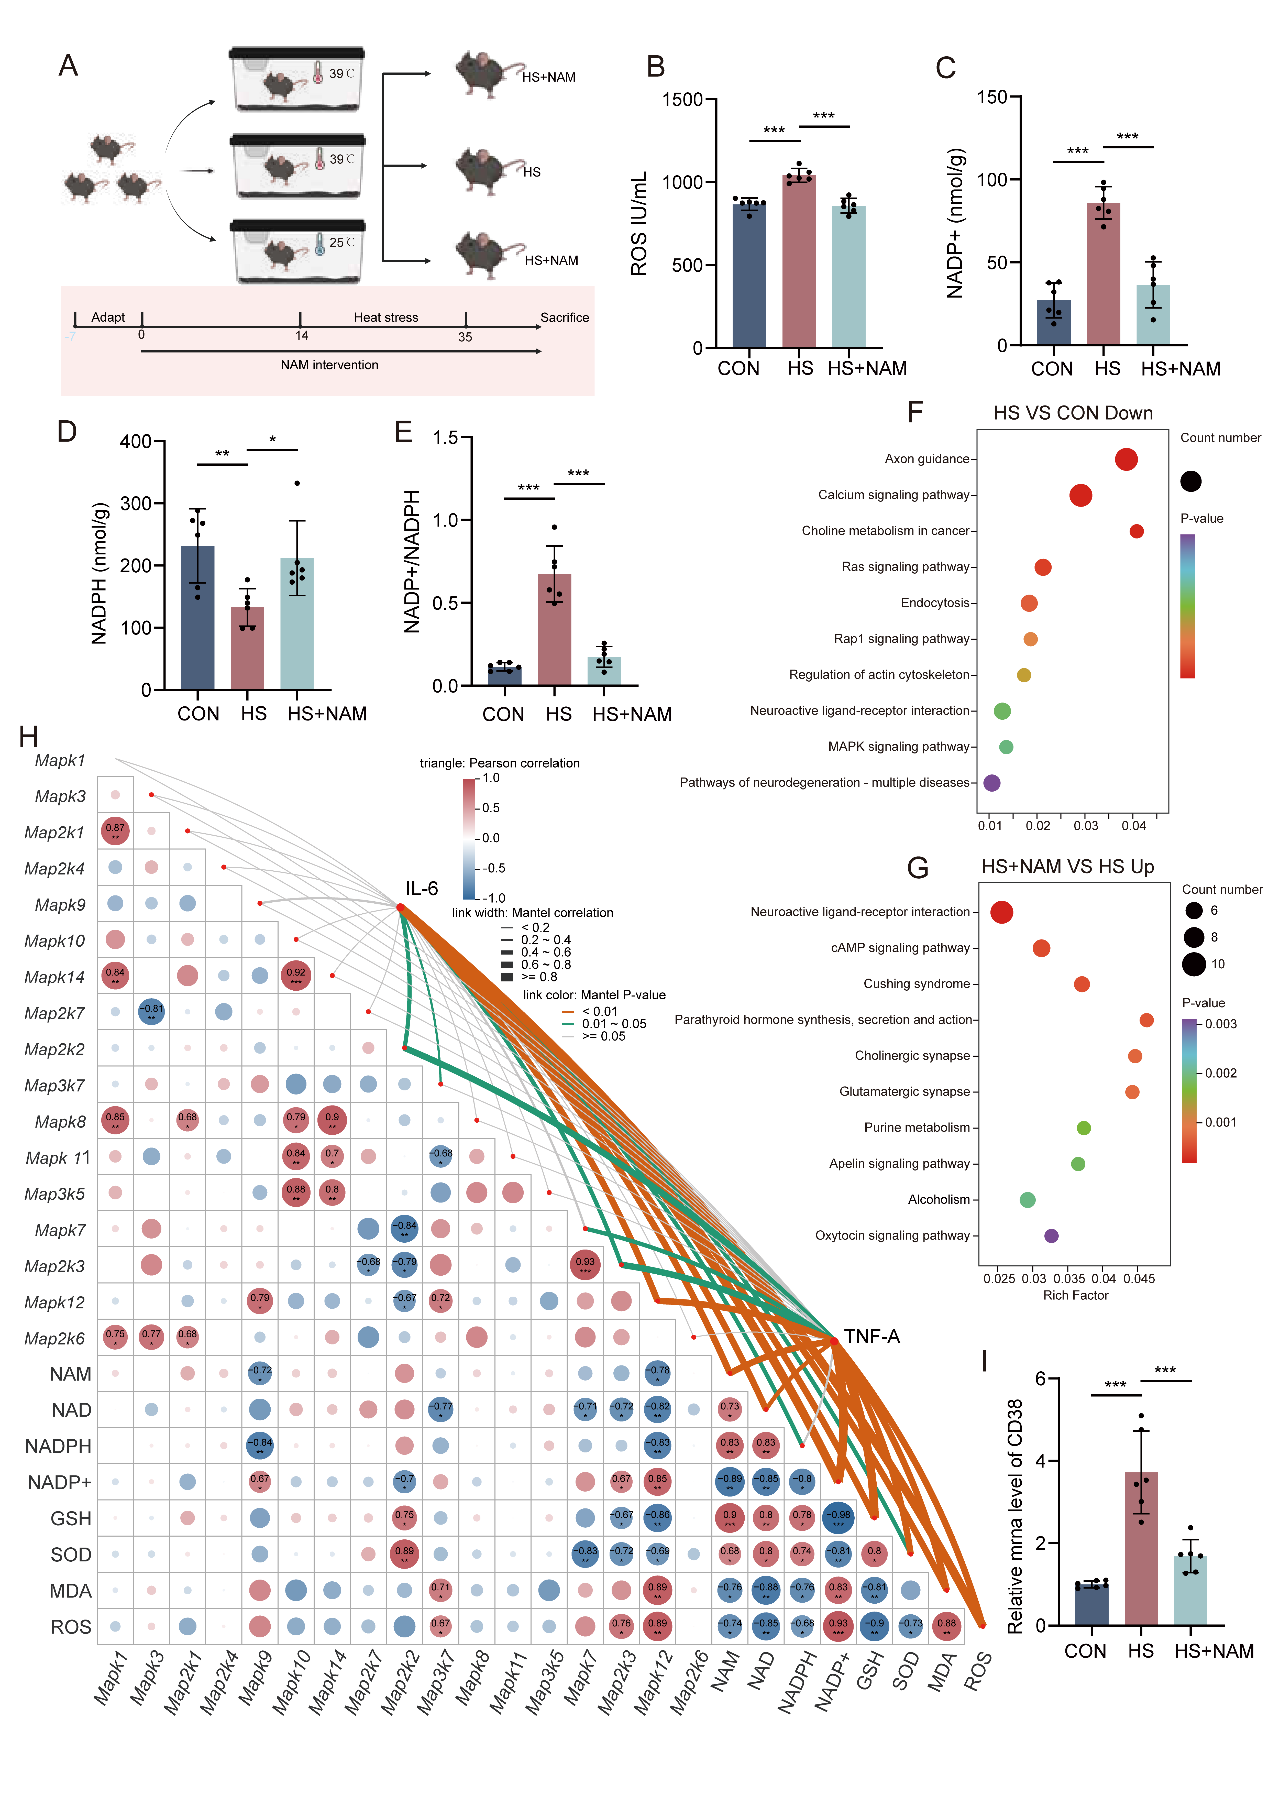


**Figure S2. A** Schematic illustration of the NAM validation experiment. **B** ROS levels in brain tissue. **C** NADP+ levels in brain tissue. **D** NADPH levels in brain tissue. **E** Ratio of NADP+ to NADPH in brain tissue. **F** Downregulated metabolic pathways in the HS group compared with those in the CON group. **G** Upregulated metabolic pathways in the HS+NAM group compared with those in the HS group. **H** Correlation analysis of inflammatory factors, core MAPK genes, and mouse physiological parameters. **I** Relative expression levels of *CD38* in the brain. P values were determined by one-way ANOVA followed by Dunnett's multiple comparison test. *p < 0.05, **p < 0.01, ***p < 0.001.
