# Supplementary material for: Nicotinamide produced by Bifidobacterium longum A127 ameliorates heat stress-induced brain damage by inhibiting the p38 MAPK pathway
Source: Research Square preprint supplement (doi:10.21203/rs.3.rs-7331250/v1), 2025-11-19
Supplement: Supplementary file 2 [file b434e17d31b32b841c18af46.xlsx]

## Sheet: Sheet1
MAPK12	CGCCACGAGAACGTCATTG	CCCAGATCAGTGCCCATGAA
ATF2	GGCCTTTAAAGTGCGATTCAG	GTTGCCATCTAGTATCTCTTTCCA
MAP2K3	ACTATCGGAGACAGAAACTTCG	GCTTGACAGCCATGATGGTA
MAP2K6	ATGATTCTTGGGGAACGCC	CATCTCATTCCGCTCCTCACT
bim	CCCGGAGATACGGATTGCAC	GCCTCGCGGTAATCATTTGC
FAS	TATCAAGGAGGCCCATTTTGC	TGTTTCCACTTCTAAACCATGCT
